# Supplementary material for: Future Mangrove Carbon Storage Under Climate Change and Deforestation
Source: Frontiers journal article supplement (doi:10.3389/fmars.2022.781876), 2022-02-10
Supplement: Table_1.DOCX [file Table_1.DOCX]

**Supplementary Table 1.** Names of climatic variables tested as predictors and how they were calculated.

| **Code** | **Name** | **Equation** | **Reference** |
| --- | --- | --- | --- |
| Bio1 | Annual Mean Temperature | |  | | --- | | Donnell and Ignizio 2012 |
| Bio2 | Annual Mean Diurnal Range | |  | | --- | | Donnell and Ignizio 2012 |
| Bio3 | Isothermality | |  | | --- | | Donnell and Ignizio 2012 |
| Bio4 | Temperature Seasonality | }   |  | | --- | | Donnell and Ignizio 2012 |
| Bio5 | Maximum Temperature of the Warmest Month | }   |  | | --- | | Donnell and Ignizio 2012 |
| Bio6 | Minimum Temperature of the Coldest Month | }   |  | | --- | | Donnell and Ignizio 2012 |
| Bio7 | Annual Temperature Range | |  | | --- | | Donnell and Ignizio 2012 |
| Bio8 | | Mean Temperature of the Wettest Quarter | | --- | | The maximum of 12 consecutive quarters' precipitation are first calculated then: | Donnell and Ignizio 2012 |
| Bio9 | Mean Temperature of the Driest Quarter | The minimum of 12 consecutive quarters' precipitation are first calculated then: | Donnell and Ignizio 2012 |
| Bio10 | Mean Temperature of the Warmest Quarter | The maximum of 12 consecutive quarters' mean temperature are first calculated then: | Donnell and Ignizio 2012 |
| Bio11 | Mean Temperature of the Coldest Quarter | The minimum of 12 consecutive quarters' mean temperature are first calculated then: | Donnell and Ignizio 2012 |
| Bio12 | Annual Precipitation |  | Donnell and Ignizio 2012 |
| Bio13 | Precipitation of the Wettest Month | } | Donnell and Ignizio 2012 |
| BIo14 | Precipitation of the Driest Month | } | Donnell and Ignizio 2012 |
| Bio15 | Precipitation Seasonality (Coefficient of Variation) | X 100   |  | | --- | | Donnell and Ignizio 2012 |
| Bio16 | Precipitation of the Wettest Quarter | The maximum of 12 consecutive quarters' precipitation | Donnell and Ignizio 2012 |
| Bio17 | Precipitation of the Driest Quarter | The minimum of 12 consecutive quarters' precipitation | Donnell and Ignizio 2012 |
| Bio18 | | Precipitation of the Warmest Quarter | | --- | | The maximum of 12 consecutive quarters' mean temperature are first calculated then: | Donnell and Ignizio 2012 |
| Bio19 | Precipitation of the Coldest Quarter | The minimum of 12 consecutive quarters' mean temperature are first calculated then: | Donnell and Ignizio 2012 |
| PET | Potential Evapotranspiration | ** | Thorntwaite 1948, however, R function thornthwaite() from SPEI package 1.7 was used |
| arid | Aridity Index | |  | | --- | | Tsakiris and Vanelis 2005 |
| sst | Sea Surface Temperature | Mean of all month’s SST | Data taken directly from source |
| tas | Mean monthly temperature | Mean of all months | Data taken directly from source |
| precip | Mean monthly precipitation | Mean of all month’s precipitation | Data taken directly from source |
