# Supplementary material for: Future Mangrove Carbon Storage Under Climate Change and Deforestation
Source: Frontiers journal article supplement (doi:10.3389/fmars.2022.781876), 2022-02-10
Supplement: Table_2.DOCX [file Table_2.DOCX]

Supplementary Table 2. Mean ± 2 standard errors emissions (Tg CO2e yr-1) for top 30 individual countries from mangrove deforestation with their % contribution and % cumulative contribution to the global total from 2010 to 2095.

| **Country** | **Emissions Tg CO2e yr-1** | **% of total** | **Cumulative %** |
| --- | --- | --- | --- |
| Indonesia | 2.57 ± 0.49 | 32.58 ± 1.37 | 32.58 ± 1.37 |
| Brazil | 0.79 ± 0.19 | 9.54 ± 0.14 | 42.12 ± 1.51 |
| Papua New Guinea | 0.51 ± 0.10 | 6.42 ± 0.21 | 48.54 ± 1.72 |
| Malaysia | 0.48 ± 0.09 | 6.10 ± 0.26 | 54.64 ± 1.98 |
| Australia | 0.26 ± 0.08 | 2.95 ± 0.26 | 57.59 ± 2.24 |
| Nigeria | 0.28 ± 0.07 | 3.35 ± 0.02 | 60.94 ± 2.26 |
| Myanmar | 0.24 ± 0.08 | 2.65 ± 0.33 | 63.58 ± 2.59 |
| Mexico | 0.22 ± 0.07 | 2.37 ± 0.30 | 65.95 ± 2.89 |
| Venezuela | 0.23 ± 0.06 | 2.65 ± 0.11 | 68.60 ± 3.00 |
| Colombia | 0.22 ± 0.06 | 2.57 ± 0.07 | 71.16 ± 3.07 |
| Philippines | 0.23 ± 0.05 | 2.9 ± 0.10 | 74.06 ± 3.17 |
| Thailand | 0.20 ± 0.04 | 2.51 ± 0.07 | 76.57 ± 3.24 |
| Bangladesh | 0.15 ± 0.05 | 1.63 ± 0.16 | 78.20 ± 3.40 |
| Cuba | 0.15 ± 0.04 | 1.78 ± 0.01 | 79.97 ± 3.41 |
| Panama | 0.14 ± 0.03 | 1.73 ± 0.02 | 81.70 ± 3.43 |
| United States | 0.13 ± 0.04 | 1.47 ± 0.08 | 83.17 ± 3.51 |
| Cameroon | 0.13 ± 0.03 | 1.54 ± 0.01 | 84.70 ± 3.52 |
| Gabon | 0.10 ± 0.03 | 1.19 ± 0.05 | 85.89 ± 3.57 |
| Mozambique | 0.10 ± 0.03 | 1.08 ± 0.10 | 86.96 ± 3.67 |
| Ecuador | 0.08 ± 0.03 | 0.77 ± 0.17 | 87.73 ± 3.84 |
| Guinea | 0.09 ± 0.03 | 0.99 ± 0.06 | 88.72 ± 3.90 |
| Guinea-Bissau | 0.07 ± 0.02 | 0.80 ± 0.07 | 89.52 ± 3.97 |
| Madagascar | 0.07 ± 0.02 | 0.80 ± 0.07 | 90.31 ± 4.04 |
| India | 0.07 ± 0.02 | 0.76 ± 0.05 | 91.07 ± 4.09 |
| Sierra Leone | 0.07 ± 0.02 | 0.76 ± 0.05 | 91.82 ± 4.14 |
| Vietnam | 0.07 ± 0.02 | 0.76 ± 0.05 | 92.58 ± 4.19 |
| Nicaragua | 0.06 ± 0.02 | 0.67 ± 0.01 | 93.25 ± 4.20 |
| Honduras | 0.05 ± 0.01 | 0.63 ± 0.02 | 93.87 ± 4.22 |
| Solomon Is. | 0.05 ± 0.01 | 0.63 ± 0.02 | 94.50 ± 4.24 |
| Fiji | 0.05 ± 0.01 | 0.59 ± 0.04 | 95.08 ± 4.28 |
