# Supplementary material for: Future Mangrove Carbon Storage Under Climate Change and Deforestation
Source: Frontiers journal article supplement (doi:10.3389/fmars.2022.781876), 2022-02-10
Supplement: Table_3.DOCX [file Table_3.DOCX]

**Supplementary Table 3.** Climate ensemble members and weighting coefficients for forecasted climate datasets.

|  | **Weighting coefficients** | | | | |  |
| --- | --- | --- | --- | --- | --- | --- |
| **Climate Model** | **Pmean** | | **Tmean** | | **Tmax** | **Tmin** |
| CanESM5 | 0.22 | 0.84 | | 1.56 | | 0.76 |
| FGOALS-g3 | <0.01 | 1.27 | | 0.92 | | 0.96 |
| GFDL-ESM4 | 3.77 | 0.73 | | 0.19 | | 0.15 |
| IPSL-CM6A-LR | 3.00 | 0.87 | | 0.97 | | 0.98 |
| MIROC6 | <0.01 | 1.45 | | 1.09 | | 1.60 |
| MPI-ESM-1-2-HR | <0.01 | 0.69 | | 1.28 | | 1.49 |
| MRI-ESM2-0 | 0.01 | 1.15 | | 1.00 | | 1.05 |
