# Supplementary material for: Future Mangrove Carbon Storage Under Climate Change and Deforestation
Source: Frontiers journal article supplement (doi:10.3389/fmars.2022.781876), 2022-02-10
Supplement: Table_4.DOCX [file Table_4.DOCX]

**REFERENCES**

Adame, M. F., Kauffman, J. B., Medina, I., Gamboa, J. N., Torres, O., Caamal, J. P., et al. (2013). Carbon Stocks of Tropical Coastal Wetlands within the Karstic Landscape of the Mexican Caribbean. *PLoS One* 8, e56569. doi:10.1371/journal.pone.0056569.

Adame, M. F., Reef, R., Herrera-Silveira, J. A., and Lovelock, C. E. (2012). Sensitivity of dissolved organic carbon exchange and sediment bacteria to water quality in mangrove forests. *Hydrobiologia* 691, 239–253. doi:10.1007/s10750-012-1071-7.

Adame, M. F., Santini, N. S., Tovilla, C., Vazquez-Lule, A., and Guevara, M. (2015). Carbon stocks and soil sequestration rates of riverine mangroves and freshwater wetlands. *Biogeosciences* 12, 1015–1045. doi:10.5194/bgd-12-1015-2015.

Ajonina, G. N., Kairo, J., Grimsditch, G., Sembres, T., Chuyong, G., and Diyouke, E. (2014). “Assessment of Mangrove Carbon Stocks in Cameroon, Gabon, the Republic of Congo (RoC) and the Democratic Republic of Congo (DRC) Including their Potential for Reducing Emissions from Deforestation and Forest Degradation (REDD+),” in *The Land/Ocean Interactions in the Coastal Zone of West and Central Africa. Estuaries of the World* (Springer, Cham), 177–189. doi:https://doi.org/10.1007/978-3-319-06388-1_15.

Almahasheer, H., Serrano, O., Duarte, C. M., Arias-Ortiz, A., Masque, P., and Irigoien, X. (2017). Low Carbon sink capacity of Red Sea mangroves. *Sci. Rep.* 7, 9700. doi:10.1038/s41598-017-10424-9.

Alongi, D., Ayukai, T., Brunskill, G., Clough, B., and Wolanski, E. (1998). Sources, sinks, and export of organic carbon through a tropical, semi‐enclosed delta (Hinchinbrook Channel, Australia). *Mangroves Salt Marshes* 2, 237–242. doi:10.1023/A:1009927611025.

Alongi, D. M. (2008). Mangrove forests: Resilience, protection from tsunamis, and responses to global climate change. *Estuar. Coast. Shelf Sci.* 76, 1–13. doi:10.1016/j.ecss.2007.08.024.

Alongi, D. M., Pfitzner, J., Trott, L. A., Tirendi, F., Dixon, P., and Klumpp, D. W. (2005). Rapid sediment accumulation and microbial mineralization in forests of the mangrove Kandelia candel in the Jiulongjiang Estuary, China. *Estuar. Coast. Shelf Sci.* 63, 605–618. doi:10.1016/j.ecss.2005.01.004.

Alongi, D. M., Sasekumar, A., Chong, V. C., Pfitzner, J., Trott, L. A., Tirendi, F., et al. (2004). Sediment accumulation and organic material flux in a managed mangrove ecosystem: Estimates of land-ocean-atmosphere exchange in peninsular Malaysia. *Mar. Geol.* 208, 383–402. doi:10.1016/j.margeo.2004.04.016.

Alongi, D. M., Wattayakorn, G., Pfitzner, J., Tirendi, F., Zagorskis, I., Brunskill, G. ., et al. (2001). Organic carbon accumulation and metabolic pathways in sediments of mangrove forests in southern Thailand. *Mar. Geol.* 179, 85–103. doi:10.1016/S0025-3227(01)00195-5.

Andreetta, A., Fusi, M., Cameldi, I., Cimò, F., Carnicelli, S., and Cannicci, S. (2014). Mangrove carbon sink. Do burrowing crabs contribute to sediment carbon storage? Evidence from a Kenyan mangrove system. *J. Sea Res.* 85, 524–533. doi:10.1016/j.seares.2013.08.010.

Andreetta, A., Huertas, A. D., Lotti, M., and Cerise, S. (2016). Land use changes affecting soil organic carbon storage along a mangrove swamp rice chronosequence in the Cacheu and Oio regions (northern Guinea-Bissau). *Agric. Ecosyst. Environ.* 216, 314–321. doi:10.1016/j.agee.2015.10.017.

Arianto, C., Seca, G., Noraini, R., Ahmad, M. M. P., Osumanu, H. A., Hazandy, A. H., et al. (2015). Soil carbon storage in dominant species of Mangrove Forest of Sarawak, Malaysia. *Int. J. Phys. Sci.* 10, 210–214. doi:10.5897/IJPS2014.4183.

Atwood, T. B., Connolly, R. M., Almahasheer, H., Carnell, P. E., Duarte, C. M., Lewis, C. J. E., et al. (2017). Global patterns in mangrove soil carbon stocks and losses. *Nat. Clim. Chang.* 7, 523–528. doi:10.1038/nclimate3326.

Bao, H., Wu, Y., Unger, D., Du, J., Herbeck, L. S., and Zhang, J. (2013). Impact of the conversion of mangroves into aquaculture ponds on the sedimentary organic matter composition in a tidal flat estuary (Hainan Island, China). *Cont. Shelf Res.* 57, 82–91. doi:10.1016/j.csr.2012.06.016.

Barreto, M. B., Lo Mónaco, S., Díaz, R., Barreto-Pittol, E., López, L., and Peralba, M. do C. R. (2016). Soil organic carbon of mangrove forests (Rhizophora and Avicennia) of the Venezuelan Caribbean coast. *Org. Geochem.* 100, 51–61. doi:10.1016/j.orggeochem.2016.08.002.

Bhomia, R. K., Kauffman, J. B., and McFadden, T. N. (2016). Ecosystem carbon stocks of mangrove forests along the Pacific and Caribbean coasts of Honduras. *Wetl. Ecol. Manag.* 24, 187–201. doi:10.1007/s11273-016-9483-1.

Bianchi, T. S., Allison, M. A., Zhao, J., Li, X., Comeaux, R. S., Feagin, R. A., et al. (2013). Historical reconstruction of mangrove expansion in the Gulf of Mexico: Linking climate change with carbon sequestration in coastal wetlands. *Estuar. Coast. Shelf Sci.* 119, 7–16. doi:10.1016/j.ecss.2012.12.007.

Breithaupt, J. L., Smoak, J. M., Smith, T. J., and Sanders, C. J. (2014). Temporal variability of carbon and nutrient burial, sediment accretion, and mass accumulation over the past century in a carbonate platform mangrove forest of the Florida Everglades. *J. Geophys. Res. G Biogeosciences* 119, 2032–2048. doi:10.1002/2014JG002715.

Breithaupt, J. L., Smoak, J. M., Smith, T. J., Sanders, C. J., and Hoare, A. (2012). Organic carbon burial rates in mangrove sediments: Strengthening the global budget. *Global Biogeochem. Cycles* 26. doi:10.1029/2012GB004375.

Brunskill, G. J., Zagorskis, I., and Pfitzner, J. (2002). Carbon burial rates in sediments and a carbon mass balance for the Herbert River region of the Great Barrier Reef continental shelf, north Queensland, Australia. *Estuar. Coast. Shelf Sci.* 54, 677–700. doi:10.1006/ecss.2001.0852.

Bulmer, R. H., Lundquist, C. J., and Schwendenmann, L. (2015). Sediment properties and CO2 efflux from intact and cleared temperate mangrove forests. *Biogeosciences* 12, 6169–6180. doi:10.5194/bg-12-6169-2015.

Callaway, J. C., Delaune, R. D., and Patrick, W. H. (1997). Sediment Accretion Rates from Four Coastal Wetlands Along the Gulf of Mexico. *J. Coast. Res.* 13, 181–191.

Chakraborty, P., Chakraborty, S., Ramteke, D., and Chennuri, K. (2014). Kinetic speciation and bioavailability of copper and nickel in mangrove sediments. *Mar. Pollut. Bull.* 88, 224–230. doi:10.1016/j.marpolbul.2014.08.040.

Chambers, L. G., Davis, S. E., Troxler, T., Boyer, J. N., Downey-Wall, A., and Scinto, L. J. (2014). Biogeochemical effects of simulated sea level rise on carbon loss in an Everglades mangrove peat soil. *Hydrobiologia* 726, 195–211. doi:10.1007/s10750-013-1764-6.

Chanda, A., Akhand, A., Manna, S., Dutta, S., Das, I., Hazra, S., et al. (2014). Measuring daytime CO2 fluxes from the inter-tidal mangrove soils of Indian Sundarbans. *Environ. Earth Sci.* 72, 417–427. doi:10.1007/s12665-013-2962-2.

Chatting, M., LeVay, L., Walton, M., Skov, M. W., Kennedy, H., Wilson, S., et al. (2020). Mangrove carbon stocks and biomass partitioning in an extreme environment. *Estuar. Coast. Shelf Sci.* 244. doi:10.1016/j.ecss.2020.106940.

Day, J., Coronado-Molina, C., Vera-Herrera, F., Twilley, R., Rivera-Monroy, V., Alvarez-Guillen, H., et al. (1996). A 7 year record of above-ground net primary production in a southeastern Mexican mangrove forest. *Aquat. Bot.* 55, 39–60. doi:10.1016/0304-3770(96)01063-7.

Deborde, J., Marchand, C., Molnar, N., Patrona, L., and Meziane, T. (2015). Concentrations and Fractionation of Carbon, Iron, Sulfur, Nitrogen and Phosphorus in Mangrove Sediments Along an Intertidal Gradient (Semi-Arid Climate, New Caledonia). *J. Mar. Sci. Eng.* 3, 52–72. doi:10.3390/jmse3010052.

DelVecchia, A. G., Bruno, J. F., Benninger, L., Alperin, M., Banerjee, O., and de Dios Morales, J. (2014). Organic carbon inventories in natural and restored Ecuadorian mangrove forests. *PeerJ* 2, e388. doi:10.7717/peerj.388.

Domínguez, C., Sarkar, S. K., Bhattacharya, A., Chatterjee, M., Bhattacharya, B. D., Jover, E., et al. (2010). Quantification and source identification of polycyclic aromatic hydrocarbons in core sediments from Sundarban mangrove Wetland, India. *Arch. Environ. Contam. Toxicol.* 59, 49–61. doi:10.1007/s00244-009-9444-2.

Donato, D. C., Kauffman, J. B., Mackenzie, R. A., Ainsworth, A., and Pfleeger, A. Z. (2012). Whole-island carbon stocks in the tropical Pacific: Implications for mangrove conservation and upland restoration. *J. Environ. Manage.* 97, 89–96. doi:10.1016/j.jenvman.2011.12.004.

Donato, D. C., Kauffman, J. B., Murdiyarso, D., Kurnianto, S., Stidham, M., and Kanninen, M. (2011). Mangroves among the most carbon-rich forests in the tropics. *Nat. Geosci.* 4, 293–297. doi:10.1038/ngeo1123.

Dung, L. V., Tue, N. T., Nhuan, M. T., and Omori, K. (2016). Carbon storage in a restored mangrove forest in Can Gio Mangrove Forest Park, Mekong Delta, Vietnam. *For. Ecol. Manage.* 380, 31–40. doi:10.1016/j.foreco.2016.08.032.

Eid, E. M., and Shaltout, K. H. (2016). Distribution of soil organic carbon in the mangrove Avicennia marina (Forssk.) Vierh. along the Egyptian Red Sea Coast. *Reg. Stud. Mar. Sci.* 3, 76–82. doi:10.1016/j.rsma.2015.05.006.

Ezcurra, P., Ezcurra, E., Garcillán, P. P., Costa, M. T., and Aburto-Oropeza, O. (2016). Coastal landforms and accumulation of mangrove peat increase carbon sequestration and storage. *Proc. Natl. Acad. Sci.* 113, 4404–4409. doi:10.1073/pnas.1519774113.

Fujimoto, K., Imaya, A., Tabuchi, R., Kuramoto, S., Utsugi, H., and Murofushi, T. (1999). Belowground carbon storage of Micronesian mangrove forests. *Ecol. Res.* 14, 409–413. doi:10.1046/j.1440-1703.1999.00313.x.

Giani, L., Bashan, Y., Holguin, G., and Strangmann, A. (1996). Characteristics and methanogenesis of the Balandra lagoon mangrove soils, Baja California sur, Mexico. doi:10.1016/0016-7061(96)00023-7.

Gonneea, M. E., Paytan, A., and Herrera-Silveira, J. A. (2004). Tracing organic matter sources and carbon burial in mangrove sediments over the past 160 years. *Estuar. Coast. Shelf Sci.* 61, 211–227. doi:10.1016/j.ecss.2004.04.015.

Grellier, S., Janeau, J. L., Dang Hoai, N., Nguyen Thi Kim, C., Le Thi Phuong, Q., Pham Thi Thu, T., et al. (2017). Changes in soil characteristics and C dynamics after mangrove clearing (Vietnam). *Sci. Total Environ.* 593–594, 654–663. doi:10.1016/j.scitotenv.2017.03.204.

Hemati, Z., Hossain, M., Emenike, C. U., and Rozainah, M. Z. (2015). Rate of carbon storage in soil of natural and degraded mangrove forest in Peninsular Malaysia. *Clean - Soil, Air, Water* 43, 614–619. doi:10.1002/clen.201400034.

Henry, K. M., and Twilley, R. R. (2013). Soil Development in a Coastal Louisiana Wetland during a Climate-Induced Vegetation Shift from Salt Marsh to Mangrove. *J. Coast. Res.* 292, 1273–1283. doi:10.2112/JCOASTRES-D-12-00184.1.

Higashi, T., Nutrition, A. S.-S. science and plant, and 1985, U. (1985). Soils of a Mangrove Forest Composed of Rhizophora mucronata and Bruguiera gymnorrhiza from Ishigaki Island, Japan. *Taylor Fr.* 31, 427–435.

Hossain, M. (2014). Carbon pools and fluxes in Bruguiera parviflora dominated naturally growing mangrove forest of Peninsular Malaysia. *Wetl. Ecol. Manag.* 22, 15–23. doi:10.1007/s11273-013-9318-2.

Howe, A. J., Rodríguez, J. F., and Saco, P. M. (2009). Surface evolution and carbon sequestration in disturbed and undisturbed wetland soils of the Hunter estuary, southeast Australia. *Estuar. Coast. Shelf Sci.* 84, 75–83. doi:10.1016/j.ecss.2009.06.006.

Jennerjahn, T. C., Ittekkot, V., Klöpper, S., Adi, S., Purwo Nugroho, S., Sudiana, N., et al. (2004). Biogeochemistry of a tropical river affected by human activities in its catchment: Brantas River estuary and coastal waters of Madura Strait, Java, Indonesia. *Estuar. Coast. Shelf Sci.* 60, 503–514. doi:10.1016/j.ecss.2004.02.008.

Jones, T., Ratsimba, H., Ravaoarinorotsihoarana, L., Cripps, G., and Bey, A. (2014). Ecological Variability and Carbon Stock Estimates of Mangrove Ecosystems in Northwestern Madagascar. *Forests* 5, 177–205. doi:10.3390/f5010177.

Kathiresan, K., Anburaj, R., Gomathi, V., and Saravanakumar, K. (2013). Carbon sequestration potential of Rhizophora mucronata and Avicennia marina as influenced by age, season, growth and sediment characteristics in southeast coast of India. *J. Coast. Conserv.* 17, 397–408. doi:10.1007/s11852-013-0236-5.

Kauffman, J. B., Bernardino, A. F., Ferreira, T. O., Giovannoni, L. R., De Gomes, L. E. O., Romero, D. J., et al. (2018). Carbon stocks of mangroves and salt marshes of the Amazon region, Brazil. *Biol. Lett.* 14. doi:10.1098/rsbl.2018.0208.

Kauffman, J. B., and Bhomia, R. K. (2017). Ecosystem carbon stocks of mangroves across broad environmental gradients in West-Central Africa: Global and regional comparisons. *PLoS One* 12, e0187749. doi:10.1371/journal.pone.0187749.

Kauffman, J. B., Heider, C., Cole, T. G., Dwire, K. A., and Donato, D. C. (2011). Ecosystem carbon stocks of micronesian mangrove forests. *Wetlands* 31, 343–352. doi:10.1007/s13157-011-0148-9.

Kauffman, J. B., Heider, C., Norfolk, J., and Payton, F. (2014). Carbon stocks of intact mangroves and carbon emissions arising from their conversion in the Dominican Republic. *Ecol. Appl.* 24, 518–527. doi:10.1890/13-0640.1.

Kauffman, J. B., Hernandez Trejo, H., del Carmen Jesus Garcia, M., Heider, C., and Contreras, W. M. (2016). Carbon stocks of mangroves and losses arising from their conversion to cattle pastures in the Pantanos de Centla, Mexico. *Wetl. Ecol. Manag.* 24, 203–216. doi:10.1007/s11273-015-9453-z.

Kelleway, J. J., Saintilan, N., Macreadie, P. I., and Ralph, P. J. (2016). Sedimentary Factors are Key Predictors of Carbon Storage in SE Australian Saltmarshes. *Ecosystems* 19, 865–880. doi:10.1007/s10021-016-9972-3.

Khan, M. N. I., Suwa, R., and Hagihara, A. (2007). Carbon and nitrogen pools in a mangrove stand of Kandelia obovata (S., L.) Yong: Vertical distribution in the soil-vegetation system. *Wetl. Ecol. Manag.* 15, 141–153. doi:10.1007/s11273-006-9020-8.

Koch, M. S., and Madden, C. J. (2001). Patterns of primary production and nutrient availability in a Bahamas lagoon with fringing mangroves. *Mar. Ecol. Prog. Ser.* 219, 109–119. doi:10.3354/meps219109.

Krauss, K. W., Cahoon, D. R., Allen, J. A., Ewel, K. C., Lynch, J. C., and Cormier, N. (2010). Surface elevation change and susceptibility of different mangrove zones to sea-level rise on Pacific high islands of Micronesia. *Ecosystems* 13, 129–143. doi:10.1007/s10021-009-9307-8.

Li, R., Chai, M., and Qiu, G. Y. (2016). Distribution, fraction, and ecological assessment of heavy metals in sediment-plant system in mangrove forest, South China Sea. *PLoS One* 11. doi:10.1371/journal.pone.0147308.

Livesley, S. J., and Andrusiak, S. M. (2012). Temperate mangrove and salt marsh sediments are a small methane and nitrous oxide source but important carbon store. *Estuar. Coast. Shelf Sci.* 97, 19–27. doi:10.1016/j.ecss.2011.11.002.

Lovelock, C. E., Adame, M. F., Bennion, V., Hayes, M., O’Mara, J., Reef, R., et al. (2014). Contemporary rates of carbon sequestration through vertical accretion of sediments in mangrove forests and saltmarshes of South East Queensland, Australia. *Estuaries and Coasts* 37, 763–771. doi:10.1007/s12237-013-9702-4.

Lu, W., Yang, S., Chen, L., Wang, W., Du, X., Wang, C., et al. (2014). Changes in carbon pool and stand structure of a native subtropical mangrove forest after inter-planting with exotic species Sonneratia apetala. *PLoS One* 9, e91238. doi:10.1371/journal.pone.0091238.

Lunstrum, A., and Chen, L. (2014). Soil carbon stocks and accumulation in young mangrove forests. *Soil Biol. Biochem.* 75, 223–232. doi:10.1016/j.soilbio.2014.04.008.

Lynch, J. C., Meriwether, J. R., McKee, B. A., Vera-Herrera, F., and Twilley, R. R. (1989). Recent accretion in mangrove ecosystems based on137Cs and210Pb. *Estuaries* 12, 284–299. doi:10.2307/1351907.

MacKenzie, R. A., Foulk, P. B., Klump, J. V., Weckerly, K., Purbospito, J., Murdiyarso, D., et al. (2016). Sedimentation and belowground carbon accumulation rates in mangrove forests that differ in diversity and land use: a tale of two mangroves. *Wetl. Ecol. Manag.* 24, 245–261. doi:10.1007/s11273-016-9481-3.

Marchand, C. (2017). Soil carbon stocks and burial rates along a mangrove forest chronosequence (French Guiana). *For. Ecol. Manage.* 384, 92–99. doi:10.1016/j.foreco.2016.10.030.

Marchand, C., Allenbach, M., and Lallier-Vergès, E. (2011). Relationships between heavy metals distribution and organic matter cycling in mangrove sediments (Conception Bay, New Caledonia). *Geoderma* 160, 444–456. doi:10.1016/j.geoderma.2010.10.015.

Marchio, D. A., Savarese, M., Bovard, B., and Mitsch, W. J. (2016). Carbon sequestration and sedimentation in mangrove swamps influenced by hydrogeomorphic conditions and urbanization in Southwest Florida. *Forests* 7. doi:10.3390/f7060116.

Matsui, N. (1998). Estimated stocks of organic carbon in mangrove roots and sediments in Hinchinbrook Channel, Australia. *Mangroves Salt Marshes* 2, 199–204. doi:10.1023/A:1009959909208.

Middelburg, J. J., Nieuwenhuize, J., Slim, F. J., and Ohowa, B. (1996). Sediment biogeochemistry in an east African mangrove forest (Gazi Bay, Kenya). *Biogeochemistry* 34, 133–155. doi:10.1007/BF00000899.

Mizanur Rahman, M., Nabiul Islam Khan, M., Fazlul Hoque, A. K., and Ahmed, I. (2015). Carbon stock in the Sundarbans mangrove forest: spatial variations in vegetation types and salinity zones. *Wetl. Ecol. Manag.* 23, 269–283. doi:10.1007/s11273-014-9379-x.

Monteiro, F. F., Cordeiro, R. C., Santelli, R. E., Machado, W., Evangelista, H., Villar, L. S., et al. (2012). Sedimentary geochemical record of historical anthropogenic activities affecting Guanabara Bay (Brazil) environmental quality. *Environ. Earth Sci.* 65, 1661–1669. doi:10.1007/s12665-011-1143-4.

Murdiyarso, D., Purbopuspito, J., Kauffman, J. B., Warren, M. W., Sasmito, S. D., Donato, D. C., et al. (2015). The potential of Indonesian mangrove forests for global climate change mitigation. *Nat. Clim. Chang.* 5, 1089–1092. doi:10.1038/nclimate2734.

Nam, V. N., Sasmito, S. D., Murdiyarso, D., Purbopuspito, J., and MacKenzie, R. A. (2016). Carbon stocks in artificially and naturally regenerated mangrove ecosystems in the Mekong Delta. *Wetl. Ecol. Manag.* 24, 231–244. doi:10.1007/s11273-015-9479-2.

Nehren, U., and Wicaksono, P. (2018). Mapping soil carbon stocks in an oceanic mangrove ecosystem in Karimunjawa Islands, Indonesia. *Estuar. Coast. Shelf Sci.* 214, 185–193. doi:10.1016/j.ecss.2018.09.022.

Nóbrega, G. N., Ferreira, T. O., Siqueira Neto, M., Queiroz, H. M., Artur, A. G., Mendonça, E. D. S., et al. (2016). Edaphic factors controlling summer (rainy season) greenhouse gas emissions (CO2and CH4) from semiarid mangrove soils (NE-Brazil). *Sci. Total Environ.* 542, 685–693. doi:10.1016/j.scitotenv.2015.10.108.

Ntyam, S. C. O., Armah, A. K., Ajonina, G. N., George, W., Adomako, J. K., Elvis, N., et al. (2014). “Importance of Mangrove Litter Production in the Protection of Atlantic Coastal Forest of Cameroon and Ghana,” in *The Land/Ocean Interactions in the Coastal Zone of West and Central Africa*, 123. doi:10.1007/978-3-319-06388-1_11.

Oyo-Ita, O. E., and Oyo-Ita, I. O. (2013). PAH depositional history and sources in recent sediment core from Ukwa Ibom Lake, S. E. Nigeria. *Environ. Geochem. Health* 35, 185–199. doi:10.1007/s10653-012-9475-x.

Pazi, A., Gandaseca, S., Rosli, N., Hanafi, A., Hamzah, A., and Nyangon, L. (2016). Soil pH and Carbon at Different Depth in Three Zones of Mangrove Forest in Sarawak, Malaysia. *Malaysian For.* 79.

Perera, K. A. R. S., and Amarasinghe, M. D. (2016). Atmospheric carbon removal capacity of a mangrove ecosystem in a micro-tidal basin estuary in Sri Lanka. *Atmos. Environ.* 134, 121–128. doi:10.1016/j.atmosenv.2016.03.034.

Pérez, A., Machado, W., Gutierrez, D., Stokes, D., Sanders, L., Smoak, J. M., et al. (2017). Changes in organic carbon accumulation driven by mangrove expansion and deforestation in a New Zealand estuary. *Estuar. Coast. Shelf Sci.* 192, 108–116. doi:10.1016/j.ecss.2017.05.009.

Phang, V. X. H., Chou, L. M., and Friess, D. A. (2015). Ecosystem carbon stocks across a tropical intertidal habitat mosaic of mangrove forest, seagrass meadow, mudflat and sandbar. *Earth Surf. Process. Landforms* 40, 1387–1400. doi:10.1002/esp.3745.

Ralison, O. H., Borges, A. V., Dehairs, F., Middelburg, J. J., and Bouillon, S. (2008). Carbon biogeochemistry of the Betsiboka estuary (north-western Madagascar). *Org. Geochem.* 39, 1649–1658. doi:10.1016/j.orggeochem.2008.01.010.

Ranjan, R. K., Routh, J., Ramanathan, A. L., and Klump, J. V. (2011). Elemental and stable isotope records of organic matter input and its fate in the Pichavaram mangrove-estuarine sediments (Tamil Nadu, India). *Mar. Chem.* 126, 163–172. doi:10.1016/j.marchem.2011.05.005.

Ray, R., Ganguly, D., Chowdhury, C., Dey, M., Das, S., Dutta, M. K., et al. (2011). Carbon sequestration and annual increase of carbon stock in a mangrove forest. *Atmos. Environ.* 45, 5016–5024. doi:10.1016/J.ATMOSENV.2011.04.074.

Rovai, A. S., Twilley, R. R., Castañeda-Moya, E., Riul, P., Cifuentes-Jara, M., Manrow-Villalobos, M., et al. (2018). Global controls on carbon storage in mangrove soils. *Nat. Clim. Chang.* 8, 534–538. doi:10.1038/s41558-018-0162-5.

Saintilan, N., Rogers, K., Mazumder, D., and Woodroffe, C. (2013). Allochthonous and autochthonous contributions to carbon accumulation and carbon store in southeastern Australian coastal wetlands. *Estuar. Coast. Shelf Sci.* 128, 84–92. doi:10.1016/j.ecss.2013.05.010.

Sakho, I., Mesnage, V., Copard, Y., Deloffre, J., Faye, G., Lafite, R., et al. (2015). A cross-section analysis of sedimentary organic matter in a mangrove ecosystem under dry climate conditions: The Somone estuary, Senegal. *J. African Earth Sci.* 101, 220–231. doi:10.1016/j.jafrearsci.2014.09.010.

Sanderman, J., Hengl, T., Fiske, G., Solvik, K., Adame, M. F., Benson, L., et al. (2018). A global map of mangrove forest soil carbon at 30 m spatial resolution. *Environ. Res. Lett.* 13, 055002. doi:10.1088/1748-9326/aabe1c.

Sanders, C. J., Santos, I. R., Maher, D. T., Breithaupt, J. L., Smoak, J. M., Ketterer, M., et al. (2016). Examining 239+240Pu, 210Pb and historical events to determine carbon, nitrogen and phosphorus burial in mangrove sediments of Moreton Bay, Australia. *J. Environ. Radioact.* 151, 623–629. doi:10.1016/j.jenvrad.2015.04.018.

Sanders, C. J., Smoak, J. M., Naidu, A. S., Araripe, D. R., Sanders, L. M., and Patchineelam, S. R. (2010a). Mangrove forest sedimentation and its reference to sea level rise, Cananeia, Brazil. *Environ. Earth Sci.* 60, 1291–1301. doi:10.1007/s12665-009-0269-0.

Sanders, C. J., Smoak, J. M., Naidu, A. S., and Patchineelam, S. R. (2008). Recent sediment accumulation in a mangrove forest and its relevance to local sea-level rise (Ilha Grande, Brazil). *J. Coast. Res.* 24, 533–536. doi:10.2112/07-0872.1.

Sanders, C. J., Smoak, J. M., Naidu, A. S., Sanders, L. M., and Patchineelam, S. R. (2010b). Organic carbon burial in a mangrove forest, margin and intertidal mud flat. *Estuar. Coast. Shelf Sci.* 90, 168–172. doi:10.1016/j.ecss.2010.08.013.

Sanders, C. J., Smoak, J. M., Sanders, L. M., Sathy Naidu, A., and Patchineelam, S. R. (2010c). Organic carbon accumulation in Brazilian mangal sediments. *J. South Am. Earth Sci.* 30, 189–192. doi:10.1016/j.jsames.2010.10.001.

Sasmito, S. D., Silanpää, M., Hayes, M. A., Bachri, S., Saragi-Sasmito, M. F., Sidik, F., et al. (2019). SWAMP Dataset-Mangrove soil carbon-West Papua-2019. *Cent. Int. For. Res.* doi:10.17528/CIFOR/DATA.00192.

Schile, L. M., Kauffman, J. B., Crooks, S., Fourqurean, J. W., Glavan, J., and Megonigal, J. P. (2017). Limits on carbon sequestration in arid blue carbon ecosystems. *Ecol. Appl.* 27, 859–874. doi:10.1002/eap.1489.

Serrano, O., Lovelock, C. E., B. Atwood, T., Macreadie, P. I., Canto, R., Phinn, S., et al. (2019). Australian vegetated coastal ecosystems as global hotspots for climate change mitigation. *Nat. Commun.* 10. doi:10.1038/s41467-019-12176-8.

Sharma, B. M., Bharat, G. K., Tayal, S., Nizzetto, L., Čupr, P., and Larssen, T. (2014). Environment and human exposure to persistent organic pollutants (POPs) in India: A systematic review of recent and historical data. *Environ. Int.* 66, 48–64. doi:10.1016/j.envint.2014.01.022.

Sitoe, A. A., Mandlate, L. J. C., and Guedes, B. S. (2014). Biomass and carbon stocks of Sofala Bay mangrove forests. *Forests* 5, 1967–1981. doi:10.3390/f5081967.

Tateda, Y., Nhan, D. D., Wattayakorn, G., and Toriumi, H. (2005). Preliminary evaluation of organic carbon sedimentation rates in Asian mangrove coastal ecosystems estimated by 210 Pb chronology . *Radioprotection* 40, S527–S532. doi:10.1051/radiopro:2005s1-077.

Thompson, B. S., Clubbe, C. P., Primavera, J. H., Curnick, D., and Koldewey, H. J. (2014). Locally assessing the economic viability of blue carbon: A case study from Panay Island, the Philippines. *Ecosyst. Serv.* 8, 128–140. doi:10.1016/j.ecoser.2014.03.004.

Ukpong, I. (2000). Ecological classiﬁcation of Nigerian mangroves using soil nutrient gradient analysis. *Wetl. Ecol. Manag.* 2, 263–274.

Ukpong, I. E. (1995). An ordination study of mangrove swamp communities in West Africa. *Vegetatio* 116, 147–159. doi:10.1007/BF00045305.

Vasconcelos, M. J., Cabral, A. I. R., Melo, J. B., Pearson, T. R. H., Pereira, H. de A., Cassamá, V., et al. (2015). Can blue carbon contribute to clean development in West-Africa? The case of Guinea-Bissau. *Mitig. Adapt. Strateg. Glob. Chang.* 20, 1361–1383. doi:10.1007/s11027-014-9551-x.

Vegas-Vilarrúbia, T., Baritto, F., López, P., Meleán, G., Ponce, M. E., Mora, L., et al. (2010). Tropical Histosols of the lower Orinoco Delta, features and preliminary quantification of their carbon storage. *Geoderma* 155, 280–288. doi:10.1016/j.geoderma.2009.12.011.

Weiss, C., Weiss, J., Boy, J., Iskandar, I., Mikutta, R., and Guggenberger, G. (2016). Soil organic carbon stocks in estuarine and marine mangrove ecosystems are driven by nutrient colimitation of P and N. *Ecol. Evol.* 6, 5043–5056. doi:10.1002/ece3.2258.

Yando, E. S., Osland, M. J., Willis, J. M., Day, R. H., Krauss, K. W., and Hester, M. W. (2016). Salt marsh-mangrove ecotones: using structural gradients to investigate the effects of woody plant encroachment on plant–soil interactions and ecosystem carbon pools. *J. Ecol.* 104, 1020–1031. doi:10.1111/1365-2745.12571.
